# Supplementary material
Source: publisher site journal article supplement (https://www.dovepress.com/article/407588)

**Supplement Figure 1.** The orientation of 9 genes in DCM patients' heart. (A) The orientation of 9 genes in patients' heart; (B-C) The expression percentage and level of 9 genes in cardiac immune cells of sham(B) and DCM patients(C).

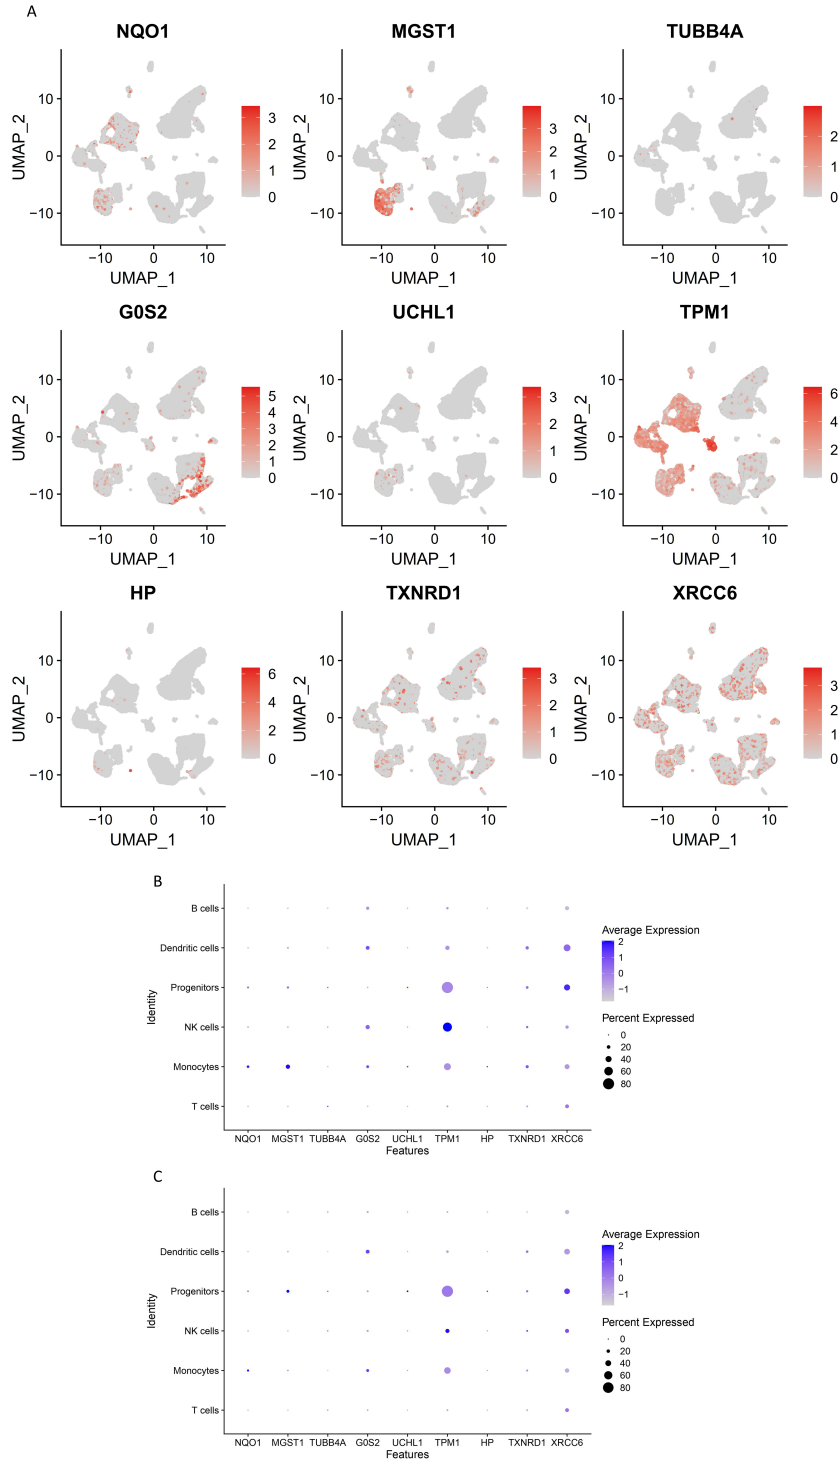

Supplement: Supplementary file 1 [file get_supplementary_file.php]
